# Supplementary material
Source: publisher figshare collection journal article supplement (https://sage.figshare.com/ndownloader/files/17282522)
Supplement: Supplementary file 1 [file 17282522]

### Appendix 3: Comparison of patients lost to follow up and main study cohort

|                                              | Main group                                                                                                                                                                | Lost to follow up group                                                                                                                                                 | Statistical testing |
|----------------------------------------------|---------------------------------------------------------------------------------------------------------------------------------------------------------------------------|-------------------------------------------------------------------------------------------------------------------------------------------------------------------------|---------------------|
| Mean age                                     | 64.5 (30-85)                                                                                                                                                              | 70.3 (43-85)                                                                                                                                                            | p < 0.001           |
| Female: Male                                 | 62.8% : 37.2%                                                                                                                                                             | 56.4% : 43.6%                                                                                                                                                           | p= 0.519            |
| Mean follow up                               | 70.7 months (48–100)                                                                                                                                                      | 20 months (1-48)                                                                                                                                                        | N/A                 |
| Surgical indication                          | Primary OA 72.5%<br>Post-traumatic OA 9.7%<br>Fracture sequelae 6.3%<br>Cuff tear arthropathy 1.4%<br>Humeral head necrosis 1.9%<br>Rheumatoid arthritis 7.2%<br>Other 1% | Primary OA 76.9%<br>Post-traumatic OA 7.7%<br>Fracture sequelae 5.1%<br>Cuff tear arthropathy 5.1%<br>Humeral head necrosis 0%<br>Rheumatoid arthritis 5.1%<br>Other 0% | p = 0.536           |
| Improvement in CMS at 24 months (N = 197:17) | 45                                                                                                                                                                        | 46.4                                                                                                                                                                    | p = 0.658           |
